# Supplementary material for: Deciphering the electrochemical kinetics of sulfur vacancy-assisted nitrogen-doped NiCo 2 S 4 combined with sulfur-doped g-C 3 N 4 towards supercapacitor applications
Source: Royal Society of Chemistry journal article supplement (doi:10.1039/d4ma00847b), 2025-01-01
Supplement: d4ma00847b1.pdf [file d4ma00847b1.pdf]

## Supporting Information

### **Deciphering the electrochemical kinetics of sulfur vacancy assisted nitrogen doped NiCo<sub>2</sub>S<sub>4</sub> combined with sulfur doped g-C<sub>3</sub>N<sub>4</sub> towards supercapacitor applications**

Soumyashree Pany<sup>a</sup>, Amtul Nashim<sup>a#</sup>, Ritik Mohanty<sup>a#</sup>, Kulamani Parida<sup>a</sup>

<sup>a</sup>Centre for Nano Science and Nano Technology, Institute of Technical Education and Research, Siksha ‘O’ Anusandhan (Deemed to be University), Bhubaneswar, 751030, India,

# Equal Contribution

\*Kulamani Parida, *SOA University, Bhubaneswar-751019*,

*E-mail: [paridakulamani@yahoo.com](mailto:paridakulamani@yahoo.com), [kulamaniparida@soa.ac.in](mailto:kulamaniparida@soa.ac.in)*

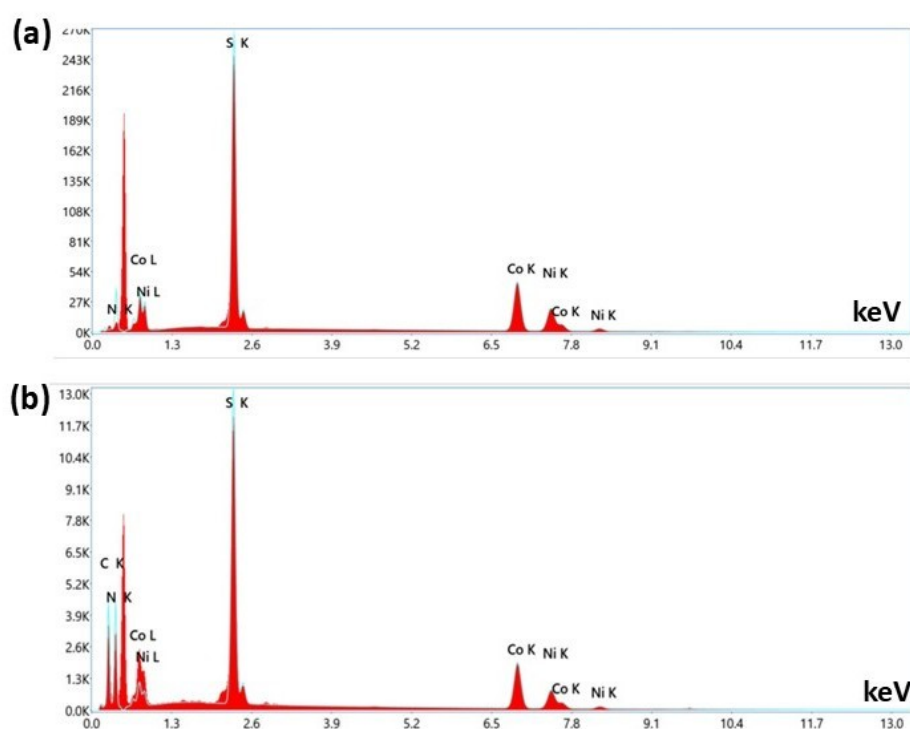

Fig.S1: Elemental composition (a) S'N-NCS and (b) S'N-NCS -S-g-CN.

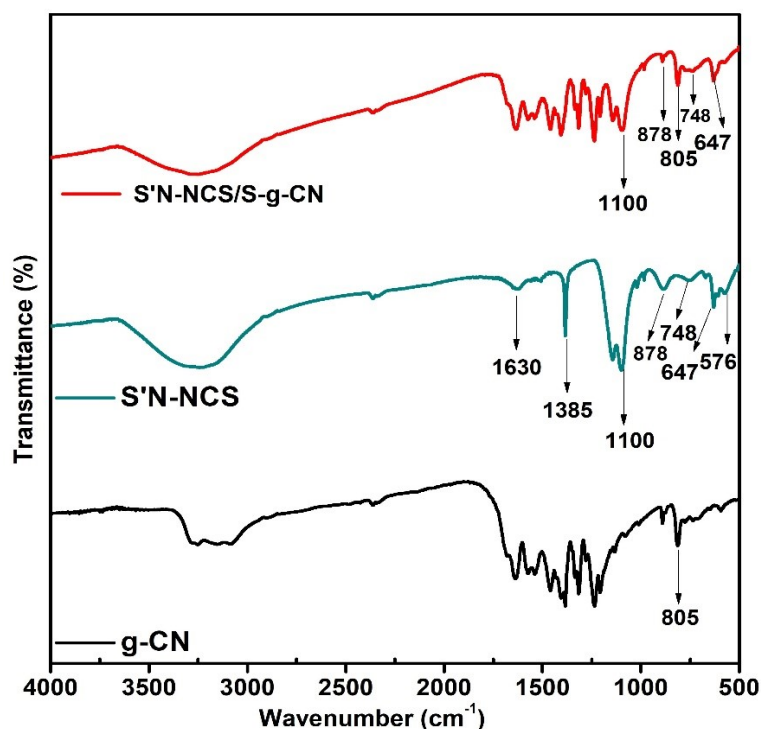

**Figure S2.** represents FTIR spectra of g-CN, S'N-NCS and S'N-NCS/S-g-CN.

Figure S3 represents FTIR spectra of g-CN, S'N-NCS and S'N-NCS/S-g-CN nanocomposite. The formation of g-C<sub>3</sub>N<sub>4</sub> is clearly observed through FTIR spectra and the peak located at 805 cm<sup>-1</sup> could be due to the characteristics breathing mode of tri-s-triazine units. The peak appeared at around 1200-1650 can be typically assigned for breathing mode of CN heterocycles. [1] The broad band in the range 3000-3400 cm<sup>-1</sup> can be ascribed to the stretching vibration of uncondensed amine group and surface adsorbed water molecule. For, S'N-NCS, the band appeared at 576, 647, 748 and 878 cm<sup>-1</sup> are assigned for symmetrical stretching vibration of Co-S or Ni-S vibration of NiCo<sub>2</sub>S<sub>4</sub>. Moreover, an intense doublet peak at 1100 cm<sup>-1</sup> is due to bending vibration of sulfide groups present in S'N-NCS. [2] The peak appeared at 1385 and 1630 cm<sup>-1</sup> might be due to the presence of residual interlayer nitrite anions and bending vibrations of adsorbed water molecules.[3] In S'N-NCS/S-g-CN nanocomposite characteristics peaks observed for g-C<sub>3</sub>N<sub>4</sub> and for S'N-NCS (NiCo<sub>2</sub>S<sub>4</sub>) confirming formation of S'N-NCS/S-g-CN nanocomposite.

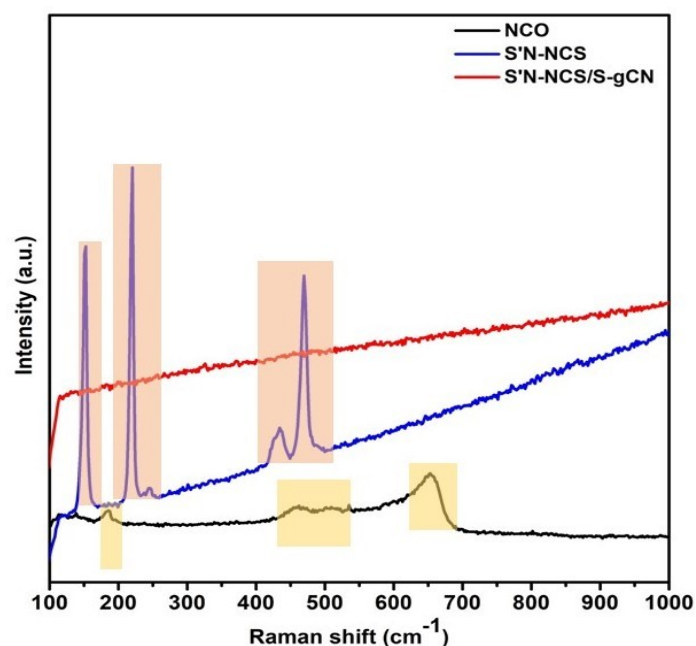

**Figure S3.** represents Raman spectra of NCO, S'N-NCS and S'N-NCS/S-g-CN.

To understand the crystal structure of the as prepared materials Raman spectroscopy has been carried out. Fig, S4 represent the Raman spectra of NCO, S'N-NCS and S'N-NCS/S-g-CN. For NCO, it shows peaks at 183, 463, 517, and 655  $\text{cm}^{-1}$ , which are due to F<sub>2g</sub>, E<sub>g</sub>, F<sub>2g</sub> and A<sub>1g</sub> mode of  $\text{NiCo}_2\text{O}_4$ . From the spectrum of NCO, the only band observed for Ni-O and Co-O, absence of other band confirming purity of  $\text{NiCo}_2\text{O}_4$  (i.e NCO). [4 ] Spectrum for S'N-NCS ( $\text{NiCo}_2\text{S}_4$ ) typically provide several prominent peaks. The peak appeared at around 150  $\text{cm}^{-1}$  can be ascribed due to the asymmetric bending of (S- $\text{Ni}_{\text{tetra}}$ -S) bonds. The bending of (S- $\text{Ni}_{\text{tetra}}$ -S) causes E<sub>g</sub> (218 and 240  $\text{cm}^{-1}$ ) mode which may arise due to torsional mode of M-S bond and sulfur ring vibration. The peak around 434 and 460  $\text{cm}^{-1}$  (E<sub>g</sub>) might be due to breathing mode involving in-plane and out-plane vibration of sulfur atoms. The observed band confirmed formation of  $\text{NiCo}_2\text{S}_4$ . [5,6] In case of S'N-NCS/S-g-CN, a plateau like spectrum noticed and it might be because of presence of g-CN which has weak efficiency towards Raman scattering. As S'N-NCS/S-g-CN possesses a remarkable amount of g-CN, it might be one of the possible causes to get plateau like spectrum.

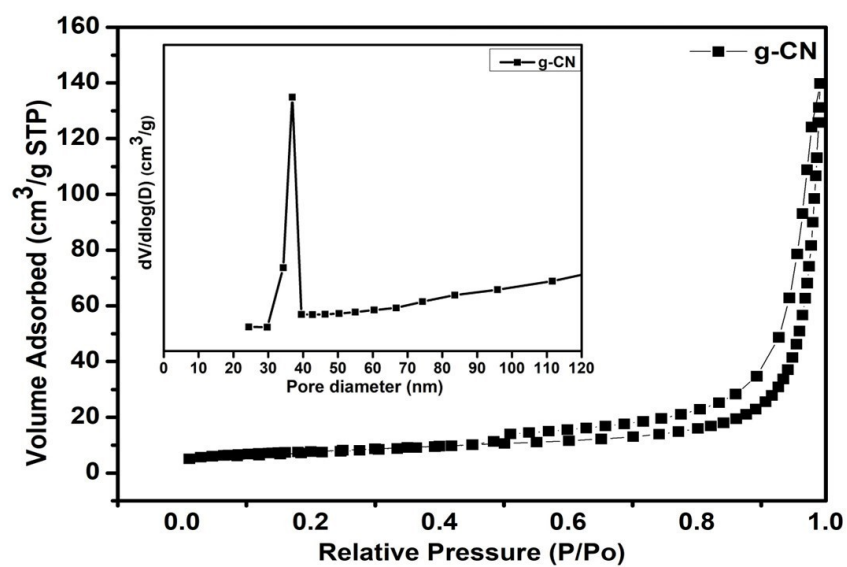

Figure S4:  $N_2$  adsorption desorption isotherm of g-CN.

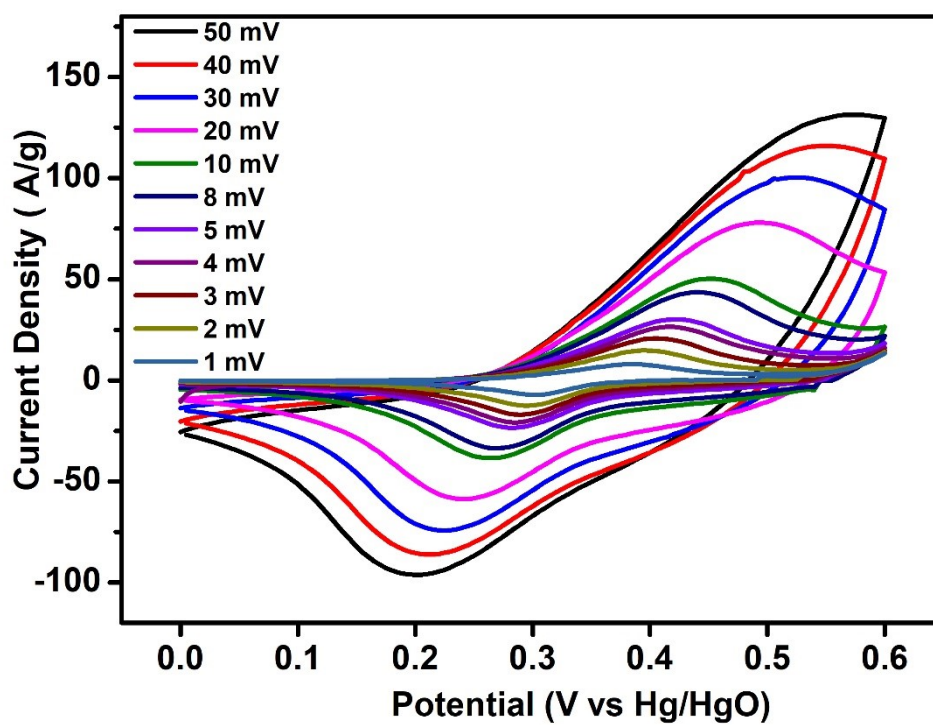

Figure S5 represents CV profile of S'N-NCS.

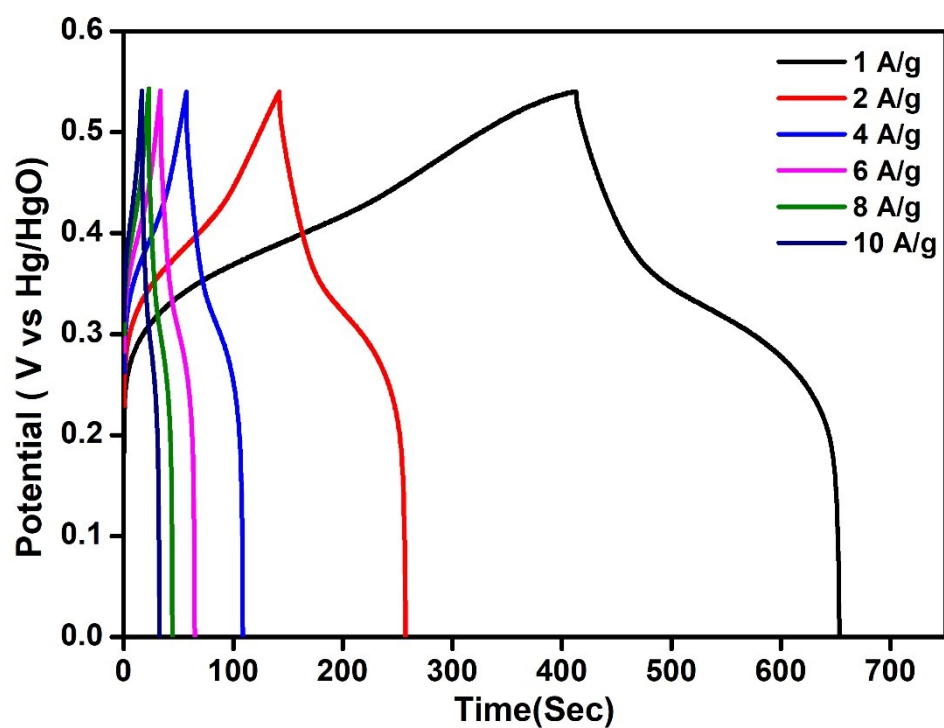

Figure S6 represents GCD profile of S'N-NCS.

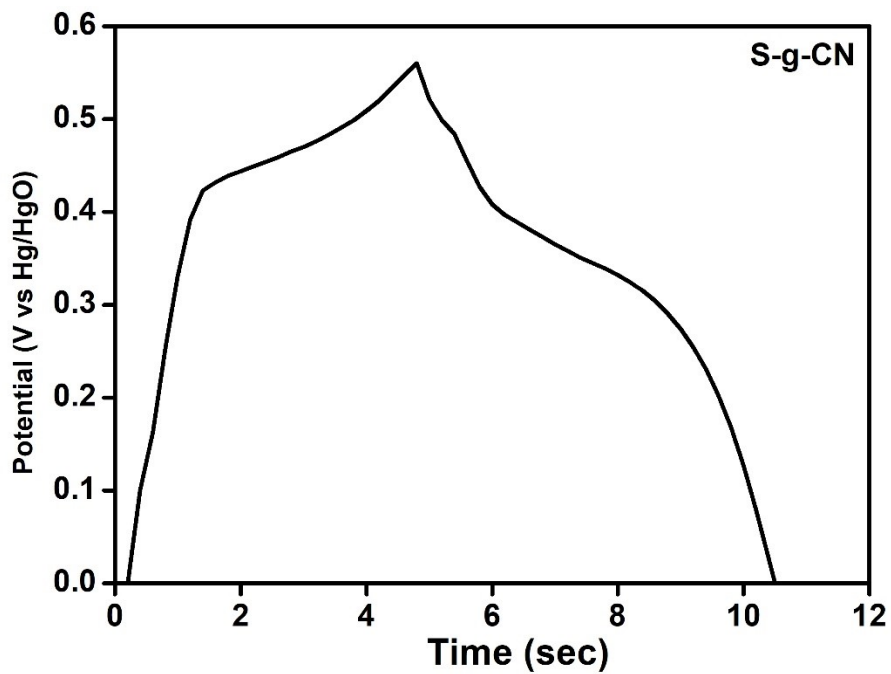

Figure S7 represents GCD profile of S-g-CN.

**Table S1** represents the specific capacity of S'N-NCS, S-g-CN and S'N-NCS/S-g-CN at different current density.

| Current Density (A/g)   |                | 1    | 2   | 4   | 6   | 8   | 10  |
|-------------------------|----------------|------|-----|-----|-----|-----|-----|
| Specific Capacity (C/g) | S'N-NCS        | 242  | 208 | 202 | 189 | 179 | 158 |
|                         | S-g-CN         | 9    | -   | -   | -   | -   | -   |
|                         | S'N-NCS/S-g-CN | 1034 | 972 | 904 | 827 | 766 | 732 |

### Theoretical specific capacitance Calculation:

Theoretical capacitance has been calculated by using the following equation

$$C_t = \frac{n \times f}{\Delta V \times m}$$

Where

n = number of moles of electrons transmitted per mole of active material (n=4)

f= faraday constant (96485 C/mol)

m= molar mass of active material (g/mol) [NiCo<sub>2</sub>S<sub>4</sub>=304.793 g/Mol]

ΔV= potential (0.5)

$$C_t = \frac{4 \times 96485}{0.5 \times 304.8} = 2532.4 \text{ F/g}$$

**Table S2** Represents the comparison among the various NiCo<sub>2</sub>S<sub>4</sub> based electrode materials with our work.

| Materials                                            | Specific Capacitance (C/g or F/g)             | Electrolyte     | Ref. |
|------------------------------------------------------|-----------------------------------------------|-----------------|------|
| NiCo <sub>2</sub> S <sub>4</sub> @NiMoO <sub>4</sub> | 1035 F g <sup>-1</sup> at 1 A g <sup>-1</sup> | 3 M KOH aqueous | 7    |

|                                                                                                  |                                                                         |                  |          |
|--------------------------------------------------------------------------------------------------|-------------------------------------------------------------------------|------------------|----------|
|                                                                                                  |                                                                         | electrolyte.     |          |
| Hollow C-NiCo <sub>2</sub> S <sub>4</sub>                                                        | 1722 F g <sup>-1</sup> / 688.8 C g <sup>-1</sup> at 1 A g <sup>-1</sup> | 6 M KOH solution | 8        |
| Mesoporous NiCo <sub>2</sub> O <sub>4</sub> and NiCo <sub>2</sub> S <sub>4</sub>                 | 1296 F g <sup>-1</sup> at a current density of 1 A g <sup>-1</sup>      | 1 M KOH          | 9        |
| Glycine-assisted hydrothermal synthesis of NiCo <sub>2</sub> S <sub>4</sub>                      | 675 F g <sup>-1</sup> at 1 A g <sup>-1</sup>                            | 6M KOH           | 10       |
| NiCo <sub>2</sub> S <sub>4</sub> /S-doped g-C <sub>3</sub> N <sub>4</sub>                        | 351.0 F g <sup>-1</sup> at 1 A g <sup>-1</sup>                          | 2M KOH           | 11       |
| NiCo <sub>2</sub> S <sub>4</sub> nanosheets on porous g-C <sub>3</sub> N <sub>4</sub> nanosheets | 506 C g <sup>-1</sup> at 1 A g <sup>-1</sup>                            | 2M KOH           | 12       |
| Sulfur vacancy mediated N-NiCo <sub>2</sub> S <sub>4</sub> /S-g-C <sub>3</sub> N <sub>4</sub>    | 1034 C g <sup>-1</sup> at 1A g <sup>-1</sup> in                         | 2M KOH           | Our work |

## Reference

- (1) S. Pany and K. M. Parida, *Phys. Chem. Chem. Phys.*, 2015, **17**, 8070-8077.
- (2) Malaya K. Sahoo and G. Ranga Rao, *Electrochimica Acta*, 2018, **268**, 139-149.
- (3) S. Pany, K. M. Parida, and B. Naik, *RSC Adv.* 2013, **3**, 4976-4984.
- (4) M. Silambarasan, P. S. Ramesh and D. Geetha, *J Mater Sci: Mater Electron*, 2017, **28**, 323-336.
- (5) A. Premkumar, B. Sridevi and K. S. Mohan, *J. Appl. Electrochem.*, DOI: [10.1007/s10800-024-02170-4](https://doi.org/10.1007/s10800-024-02170-4).
- (6) C. Xia, P. Li, A. N. Gandhi, U. Schwingenschlogl and H. N. Alshareef, *Chem. Mater.* 2015, **27**, 6482-6485.
- (7) J. Wang, Y. Li, Y. Zhao, D. Zhang, S. Song and J. Ke, *Crystals*. 2022; **12**, 821.
- (8) S.G. Mohamed, I. Hussain and J.J. Shim, *Nanoscale*, 2018, **10**, 6620-6628.
- (9) Y. Liu, Z. Wang, Y. Zhong, M. Tade, W. Zhou, Z. Shao, *Adv. Funct. Mater.* 2017, **27**, 1701229.
- (10) M.S. Kumar, N. Bhagavath, S.K. Batabyal, N.K. Kothurkar, *JS: AMD*. 2019, **4**, 376-380.

- (11) J.S Ma, H. Yang, S. Kubendhirana , L.Y. Lin, *J. Alloys Compd.* 2022, **903**,163972.
- (12) Z. Li, L.Wu, L. Wanga, A. Gua, Q. Zhou, *Electrochim Acta*, 2017, **231**,617-625.
